# Supplementary material for: Development of a portable on-site applicable metagenomic data generation workflow for enhanced pathogen and antimicrobial resistance surveillance
Source: Springer Nature journal article supplement (doi:10.1038/s41598-023-46771-z), 2023-11-11
Supplement: MOESM1 [file 41598_2023_46771_MOESM1_ESM.pdf]

Supplementary information for:

# **Development of a portable on-site applicable metagenomic data generation workflow for enhanced pathogen and antimicrobial resistance surveillance**

**Bram Bloemen<sup>1,2</sup>, Mathieu Gand<sup>1</sup>, Kevin Vanneste<sup>1</sup>, Kathleen Marchal<sup>2,3</sup>, Nancy H.C. Roosens<sup>1</sup>, and Sigrid C. J. De Keersmaecker<sup>1,\*</sup>**

<sup>1</sup> Transversal activities in Applied Genomics, Sciensano, rue Juliette Wytsman 14, 1050 Brussels, Belgium

<sup>2</sup> Department of Information Technology, IDLab, Ghent University, IMEC, 9052 Ghent, Belgium

<sup>3</sup> Department of Plant Biotechnology and Bioinformatics, Ghent University, 9052 Ghent, Belgium

\* Sigrid.dekeersmaecker@sciensano.be

| Variable        | Statistical test | p-value  | Post-hoc test                             | Results from post-hoc pairwise test between protocol iterations                                                                             | p -value        |
|-----------------|------------------|----------|-------------------------------------------|---------------------------------------------------------------------------------------------------------------------------------------------|-----------------|
| A260/230        | ANOVA            | 4.29e-20 | Tukey HSD                                 | BD without cleanup, 3 versus 4 minutes bead-beating at 6V                                                                                   | 1.00            |
|                 |                  |          |                                           | BD without cleanup, 3 versus 5 minutes bead-beating at 6V                                                                                   | 1.00            |
|                 |                  |          |                                           | BD without cleanup, 4 versus 5 minutes bead-beating at 6V                                                                                   | 1.00            |
|                 |                  |          |                                           | <b>BD 4 minutes bead beating at 6V, no versus 0.4x bead/sample AMPure</b>                                                                   | <b>2.75e-05</b> |
|                 |                  |          |                                           | <b>BD 4 minutes bead beating, no versus 0.8x bead/sample AMPure</b>                                                                         | <b>3.37e-04</b> |
|                 |                  |          |                                           | <b>BD 4 minutes bead beating, no versus 2 rounds of 0.4x bead/sample AMPure</b>                                                             | <b>3.83e-05</b> |
|                 |                  |          |                                           | BD 4 minutes bead beating, 0.8x bead/sample AMPure versus 0.4x bead/sample AMPure                                                           | 0.82            |
|                 |                  |          |                                           | BD 4 minutes bead beating, 1 versus 2 rounds of 0.4x bead/sample AMPure                                                                     | 0.94            |
|                 |                  |          |                                           | BD 4 minutes bead beating, 1 round 0.8x bead/sample AMPure versus 2 rounds of 0.4x bead/sample AMPure                                       | 1.00            |
|                 |                  |          |                                           | BD 4 minutes bead beating at 6V, 1 round 0.4x bead/sample AMPure with DNAexpress purification versus same method with QuickDNA purification | 0.26            |
|                 |                  |          |                                           | BD 4 minutes bead beating at 6V, 1 round 0.4x bead/sample AMPure with QuickDNA purification versus same method using 1.5V bead beating      | 0.36            |
|                 |                  |          |                                           | <b>BQ 4 minutes bead beating at 1.5V, 0.4x bead/sample AMPure compared to EQ with 0.4x bead/sample AMPure</b>                               | <b>2.03e-04</b> |
| A260/280        | Kruskal-Wallis   | 9e-10    | Dunn's with Benjamini-Hochberg correction | BD without cleanup, 3 versus 4 minutes bead-beating at 6V                                                                                   | 0.284           |
|                 |                  |          |                                           | BD without cleanup, 3 versus 5 minutes bead-beating at 6V                                                                                   | 0.61            |
|                 |                  |          |                                           | BD without cleanup, 4 versus 5 minutes bead-beating at 6V                                                                                   | 0.61            |
|                 |                  |          |                                           | <b>BD 4 minutes bead beating at 6V, no versus 0.4x bead/sample AMPure</b>                                                                   | <b>9.60e-03</b> |
|                 |                  |          |                                           | <b>BD 4 minutes bead beating, no versus 0.8x bead/sample AMPure</b>                                                                         | <b>5.90e-03</b> |
|                 |                  |          |                                           | <b>BD 4 minutes bead beating, no versus 2 rounds of 0.4x bead/sample AMPure</b>                                                             | <b>4.05e-03</b> |
|                 |                  |          |                                           | BD 4 minutes bead beating, 0.8x bead/sample AMPure versus 0.4x bead/sample AMPure                                                           | 0.76            |
|                 |                  |          |                                           | BD 4 minutes bead beating, 1 versus 2 rounds of 0.4x bead/sample AMPure                                                                     | 0.76            |
|                 |                  |          |                                           | BD 4 minutes bead beating, 1 round 0.8x bead/sample AMPure versus 2 rounds of 0.4x bead/sample AMPure                                       | 0.96            |
|                 |                  |          |                                           | BD 4 minutes bead beating at 6V, 1 round 0.4x bead/sample AMPure with DNAexpress purification versus same method with QuickDNA purification | 0.764           |
| DNA yield       | Kruskal-Wallis   | 9.8e-08  | Dunn's with Benjamini-Hochberg correction | BD without cleanup, 3 versus 4 minutes bead-beating at 6V                                                                                   | 0.49            |
|                 |                  |          |                                           | BD without cleanup, 3 versus 5 minutes bead-beating at 6V                                                                                   | 0.52            |
|                 |                  |          |                                           | BD without cleanup, 4 versus 5 minutes bead-beating at 6V                                                                                   | 0.93            |
|                 |                  |          |                                           | <b>BD 4 minutes bead beating at 6V, no versus 0.4x bead/sample AMPure</b>                                                                   | <b>1.4e-02</b>  |
|                 |                  |          |                                           | <b>BD 4 minutes bead beating, no versus 0.8x bead/sample AMPure</b>                                                                         | <b>2.3e-02</b>  |
|                 |                  |          |                                           | <b>BD 4 minutes bead beating, no versus 2 rounds of 0.4x bead/sample AMPure</b>                                                             | <b>1.7e-03</b>  |
|                 |                  |          |                                           | BD 4 minutes bead beating, 0.8x bead/sample AMPure versus 0.4x bead/sample AMPure                                                           | 0.53            |
|                 |                  |          |                                           | BD 4 minutes bead beating, 1 versus 2 rounds of 0.4x bead/sample AMPure                                                                     | 0.98            |
|                 |                  |          |                                           | BD 4 minutes bead beating, 1 round 0.8x bead/sample AMPure versus 2 rounds of 0.4x bead/sample AMPure                                       | 0.35            |
|                 |                  |          |                                           | BD 4 minutes bead beating at 6V, 1 round 0.4x bead/sample AMPure with DNAexpress purification versus same method with QuickDNA purification | 0.14            |
| Fragment length | Kruskal-Wallis   | 4.7e-09  | Dunn's with Benjamini-Hochberg correction | BD without cleanup, 3 versus 4 minutes bead-beating at 6V                                                                                   | 0.74            |
|                 |                  |          |                                           | BD without cleanup, 3 versus 5 minutes bead-beating at 6V                                                                                   | 0.21            |
|                 |                  |          |                                           | BD without cleanup, 4 versus 5 minutes bead-beating at 6V                                                                                   | 0.30            |
|                 |                  |          |                                           | BD 4 minutes bead beating at 6V, no versus 0.4x bead/sample AMPure                                                                          | 0.80            |
|                 |                  |          |                                           | BD 4 minutes bead beating, no versus 0.8x bead/sample AMPure                                                                                | 0.50            |
|                 |                  |          |                                           | BD 4 minutes bead beating, no versus 2 rounds of 0.4x bead/sample AMPure                                                                    | 0.54            |
|                 |                  |          |                                           | BD 4 minutes bead beating, 0.8x bead/sample AMPure versus 0.4x bead/sample AMPure                                                           | 0.49            |
|                 |                  |          |                                           | BD 4 minutes bead beating, 1 versus 2 rounds of 0.4x bead/sample AMPure                                                                     | 0.50            |
|                 |                  |          |                                           | BD 4 minutes bead beating, 1 round 0.8x bead/sample AMPure versus 2 rounds of 0.4x bead/sample AMPure                                       | 0.91            |
|                 |                  |          |                                           | BD 4 minutes bead beating at 6V, 1 round 0.4x bead/sample AMPure with DNAexpress purification versus same method with QuickDNA purification | 0.74            |

**Table S1:** Summary of statistical comparisons between methods. In each case, the normal distribution and equality of variances were tested using the Shapiro-Wilk and Bartlett's tests, respectively.

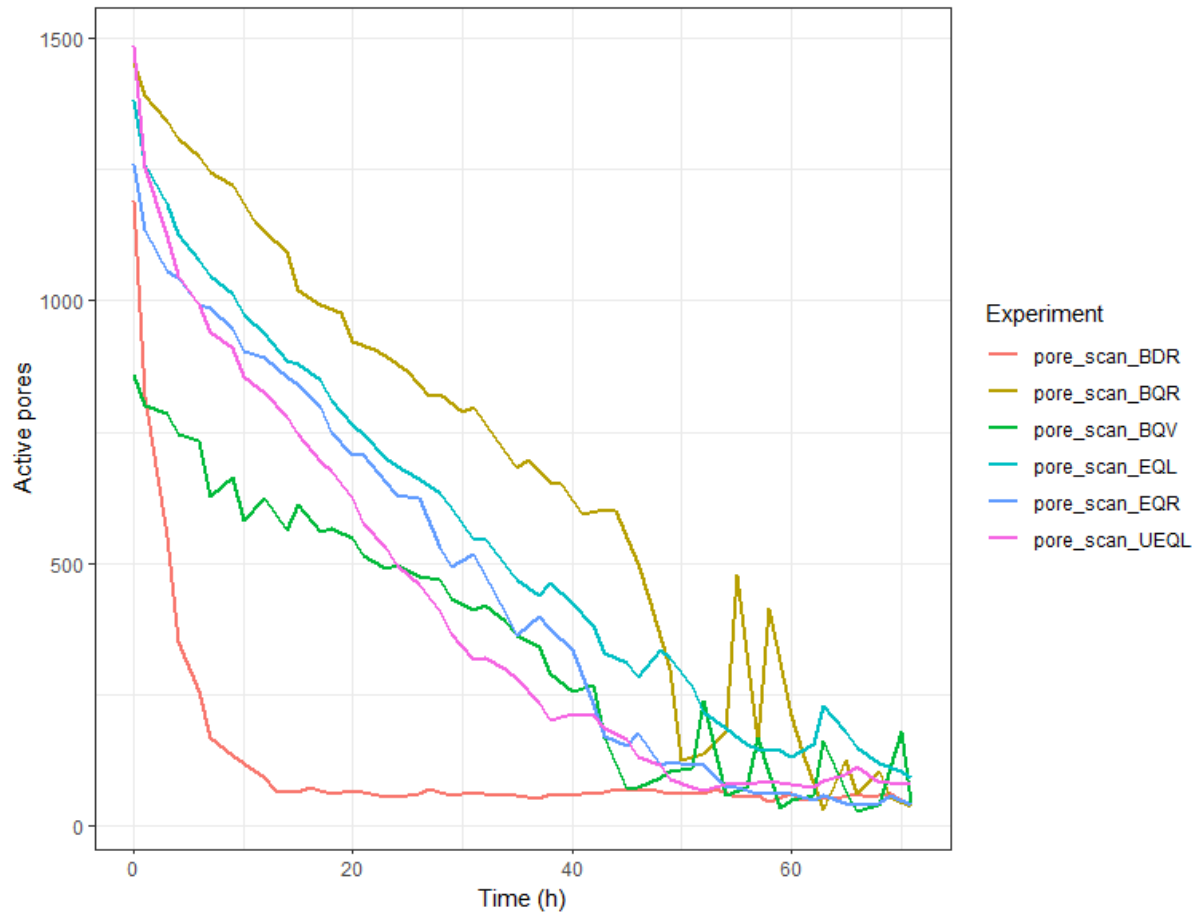

**Figure S1:** Decay of active nanopores during the various experiments. UEQL: Unspiked – Enzymatic Lysis – Quick-DNA magbead HMW– Ligation sequencing. EQL: Enzymatic Lysis – Quick-DNA magbead HMW – Ligation sequencing. EQR: Enzymatic Lysis – Quick-DNA magbead HMW – Rapid sequencing. BDR: Bead-beating – DNAexpress – Rapid sequencing. BQR: Bead-beating – Quick-DNA HMW magbead – Rapid sequencing. BQV: Bead-beating – Quick-DNA HMW magbead – Voltrax sequencing.

| Species                             | Relative abundance in DMC (%) | UEQL*    | BQR      | BQV      | BDR   | EQL      | EQR      |
|-------------------------------------|-------------------------------|----------|----------|----------|-------|----------|----------|
| <i>Akkermansia muciniphila</i>      | 1.45                          | 5.57e-02 | 1.93     | 1.54     | 0.92  | 2.25     | 1.22     |
| <i>Allobacillus halotolerans</i>    | 2.12                          | 2.06e-04 | 0.49     | 0.64     | 0.47  | 1.20     | 1.54     |
| <i>Bacteroides fragilis</i>         | 13.58                         | 15.34    | 17.57    | 20.35    | 10.60 | 16.43    | 21.53    |
| <i>Bifidobacterium adolescentis</i> | 5.82                          | 2.37e-02 | 1.08     | 1.13     | 2.18  | 2.81e-02 | 1.89e-02 |
| <i>Candida albicans</i>             | 0.74                          | 63.01    | 4.06     | 2.22     | 10.99 | 1.26     | 1.44     |
| <i>Clostridioides difficile</i>     | 1.45                          | 0.14     | 3.38     | 1.88     | 0.54  | 1.56     | 1.26     |
| <i>Clostridium perfringens</i>      | 1.00e-04                      | 0.34     | 0.22     | 0.18     | 0.33  | 0.19     | 0.21     |
| <i>Enterococcus faecalis</i>        | 1.00e-03                      | 6.52e-02 | 1.30e-02 | 2.09e-03 | 5.32  | 0.24     | 0.17     |
| <i>Escherichia coli</i>             | 13.56                         | 6.24     | 21.34    | 17.66    | 12.43 | 18.69    | 16.99    |
| <i>Faecalibacterium prausnitzii</i> | 13.55                         | 0.39     | 7.38     | 7.60     | 5.92  | 17.1     | 3.73     |
| <i>Lactobacillus fermentum</i>      | 5.83                          | 0.10     | 0.48     | 0.50     | 1.82  | 5.91     | 4.83e-02 |
| <i>Prevotella corporis</i>          | 2.82                          | 5.84     | 8.51     | 9.24     | 4.52  | 7.82     | 10.05    |
| <i>Roseburia hominis</i>            | 13.55                         | 0.13     | 4.33     | 6.18     | 6.50  | 5.02     | 6.56     |
| <i>Saccharomyces cerevisiae</i>     | 0.67                          | 2.23     | 3.80     | 0.56     | 19.46 | 0.98     | 0.80     |
| <i>Salmonella enterica</i>          | 0.01                          | 5.64e-05 | 1.00     | 0.57     | 3.39  | 2.10e-02 | 0.17     |
| <i>Veillonella rogosae</i>          | 13.58                         | 6.09     | 15.06    | 23.01    | 10.1  | 17.01    | 28.56    |
| <i>Fusobacterium nucleatum</i>      | 5.82                          | NA       | 8.39     | 4.94     | 1.37  | 3.01     | 2.31     |
| <i>Imtechella halotolerans</i>      | 2.36                          | NA       | 0.94     | 1.73     | 0.63  | 1.28     | 3.48     |
| <i>Methanobrevibacter smithii</i>   | 0.10                          | NA       | 4.81e-02 | 6.72e-02 | 2.49  | 2.71e-02 | 4.60e-02 |

**Table S2:** Theoretical abundance in the spike-in defined mock community (DMC), and the observed relative abundances in terms of the proportion of mapped bases for each experiment. UEQL: Unspiked – Enzymatic Lysis – Quick-DNA magbead HMW – Ligation sequencing. EQL: Enzymatic Lysis – Quick-DNA magbead HMW – Ligation sequencing. EQR: Enzymatic Lysis – Quick-DNA magbead HMW – Rapid sequencing. BDR: Bead-beating – DNAexpress – Rapid sequencing. BQR: Bead-beating – Quick-DNA HMW magbead – Rapid sequencing. BQV: Bead-beating – Quick-DNA HMW magbead – Voltrax sequencing. \*UEQL was not spiked with the DMC. NA: No reads mapped to this species.

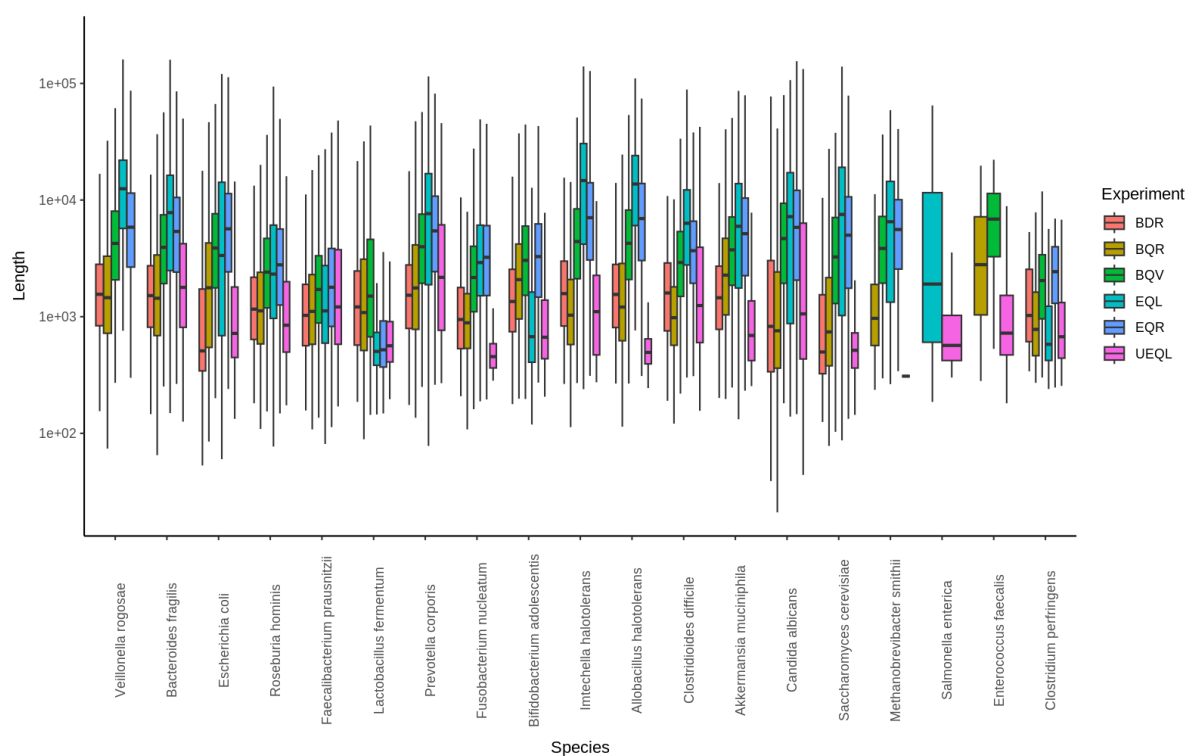

**Figure S2:** Read length distribution for each species of the spike-in DMC, by experiment. UEQL: Unspiked – Enzymatic Lysis – Quick-DNA magbead HMW– Ligation sequencing. EQL: Enzymatic Lysis – Quick-DNA magbead HMW – Ligation sequencing. EQR: Enzymatic Lysis – Quick-DNA magbead HMW – Rapid sequencing. BDR: Bead-beating – DNAexpress – Rapid sequencing. BQR: Bead-beating – Quick-DNA HMW magbead – Rapid sequencing. BQV: Bead-beating – Quick-DNA HMW magbead – Voltrax sequencing. UEQL was not spiked with the DMC.

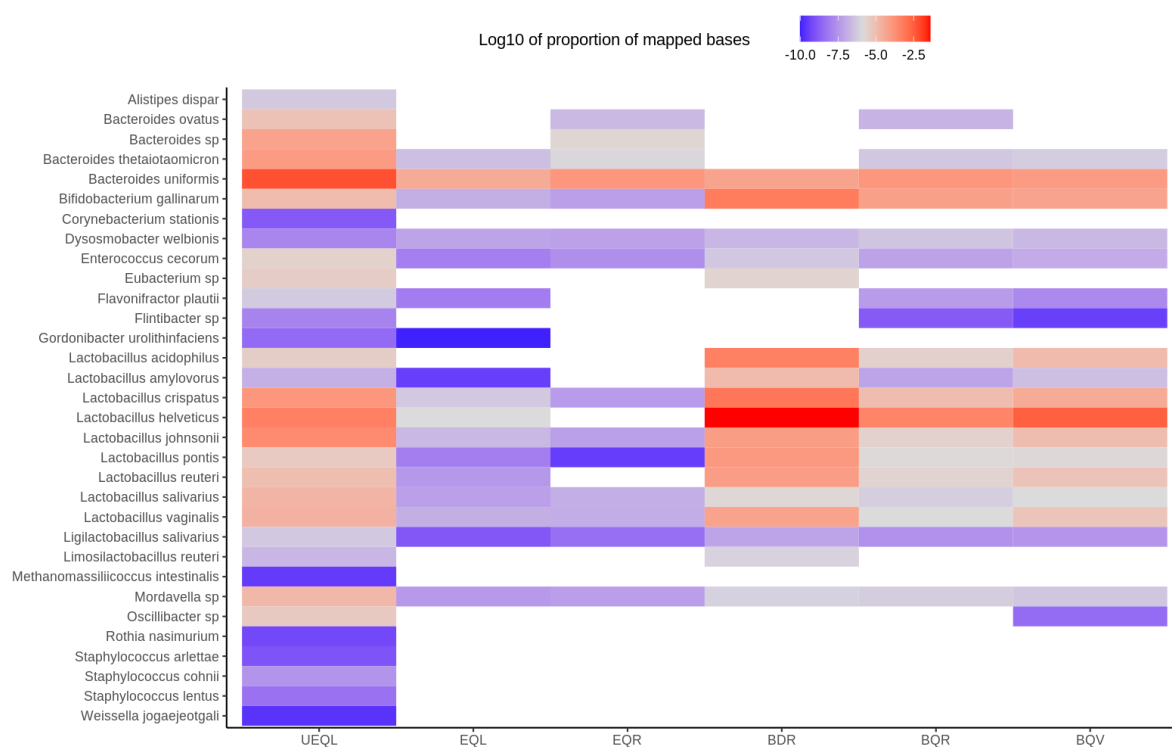

**Figure S3:** Species detected in the fecal background (UEQL) with query identity > 80% and template coverage > 5%, excluding the spike-in defined mock community members when using a broad taxonomic database. White tiles indicate that the species was not detected. UEQL: Unspiked – Enzymatic Lysis – Quick-DNA magbead HMW– Ligation sequencing. EQL: Enzymatic Lysis – Quick-DNA magbead HMW – Ligation sequencing. EQR: Enzymatic Lysis – Quick-DNA magbead HMW – Rapid sequencing. BDR: Bead-beating – DNAexpress – Rapid sequencing. BQR: Bead-beating – Quick-DNA HMW magbead – Rapid sequencing. BQV: Bead-beating – Quick-DNA HMW magbead – Voltrax sequencing. UEQL was not spiked with the DMC.

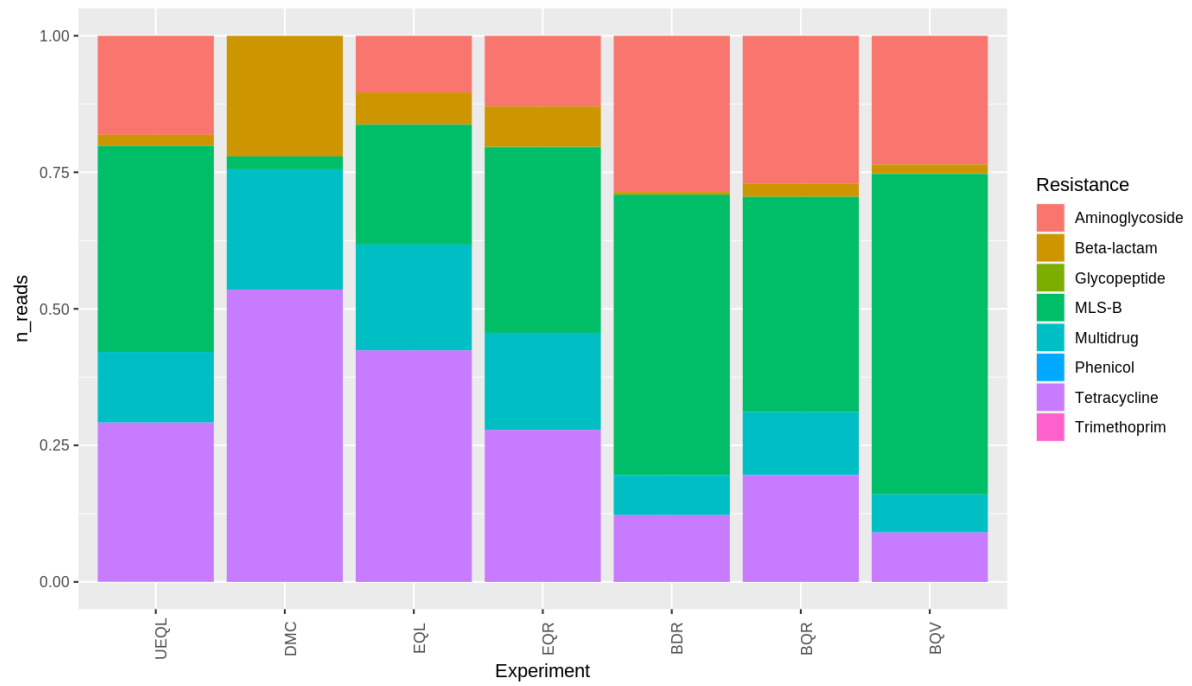

**Figure S4:** Normalized distribution of antibiotic resistance classes. MLS-B: Macrolide-Lincosamide-Streptogramin-B resistance. UEQL: fecal background consisting of Unspiked fecal sample – Enzymatic Lysis – Quick-DNA magbead HMW – Ligation sequencing. EQL: Enzymatic Lysis – Quick-DNA magbead HMW – Ligation sequencing. EQR: Enzymatic Lysis – Quick-DNA magbead HMW – Rapid sequencing. BDR: Bead-beating – DNAexpress – Rapid sequencing. BQR: Bead-beating – Quick-DNA HMW magbead – Rapid sequencing. BQV: Bead-beating – Quick-DNA HMW magbead – Voltrax sequencing. UEQL was not spiked with the reference community. DMC: abundance of resistance gene classes in the spike-in defined mock community.



| Reference sequence                         | Template ARG        | Template length | Template Identity | Template Coverage | Query Identity | Query Coverage | Depth | Q value | P value |
|--------------------------------------------|---------------------|-----------------|-------------------|-------------------|----------------|----------------|-------|---------|---------|
| <i>R. hominis</i> (Defined mock community) | <i>blaAST-I</i>     | 933             | 0.00              | 0.00              | 0.00           | 0.00           | 0.00  | 23.96   | 9.8e-07 |
|                                            | <i>mcr-4.1</i>      | 1626            | 0.00              | 0.00              | 0.00           | 0.00           | 0.00  | 16.93   | 3.9e-05 |
|                                            | <i>tlr(C)</i>       | 1647            | 0.00              | 0.00              | 0.00           | 0.00           | 0.00  | 18.93   | 1.4e-05 |
|                                            |                     |                 |                   |                   |                |                |       |         |         |
| <i>R. hominis</i><br>(NZ_LR699011.1)       | <i>ant(6)-Ia</i>    | 909             | 0.00              | 0.00              | 0.00           | 0.00           | 0.00  | 491.40  | 1.0e-26 |
|                                            | <i>aph(3')-IIIa</i> | 795             | 99.87             | 100.00            | 99.87          | 100.00         | 1.00  | 786.97  | 1.0e-26 |
|                                            | <i>mcr-4.1</i>      | 1626            | 0.00              | 0.00              | 0.00           | 0.00           | 0.00  | 12.23   | 4.7e-04 |
|                                            | <i>tlr(C)</i>       | 1647            | 0.00              | 0.00              | 0.00           | 0.00           | 0.00  | 14.11   | 1.7e-04 |
|                                            | <i>tet(W)</i>       | 1920            | 99.90             | 100.00            | 99.90          | 100.00         | 1.00  | 1909.35 | 1.0e-26 |

**Table S3:** Antibiotic resistance gene (ARG) detected by KMA and the ResFinder database, in *Roseburia hominis* reference genomes obtained from the DMC or from NCBI refseq.

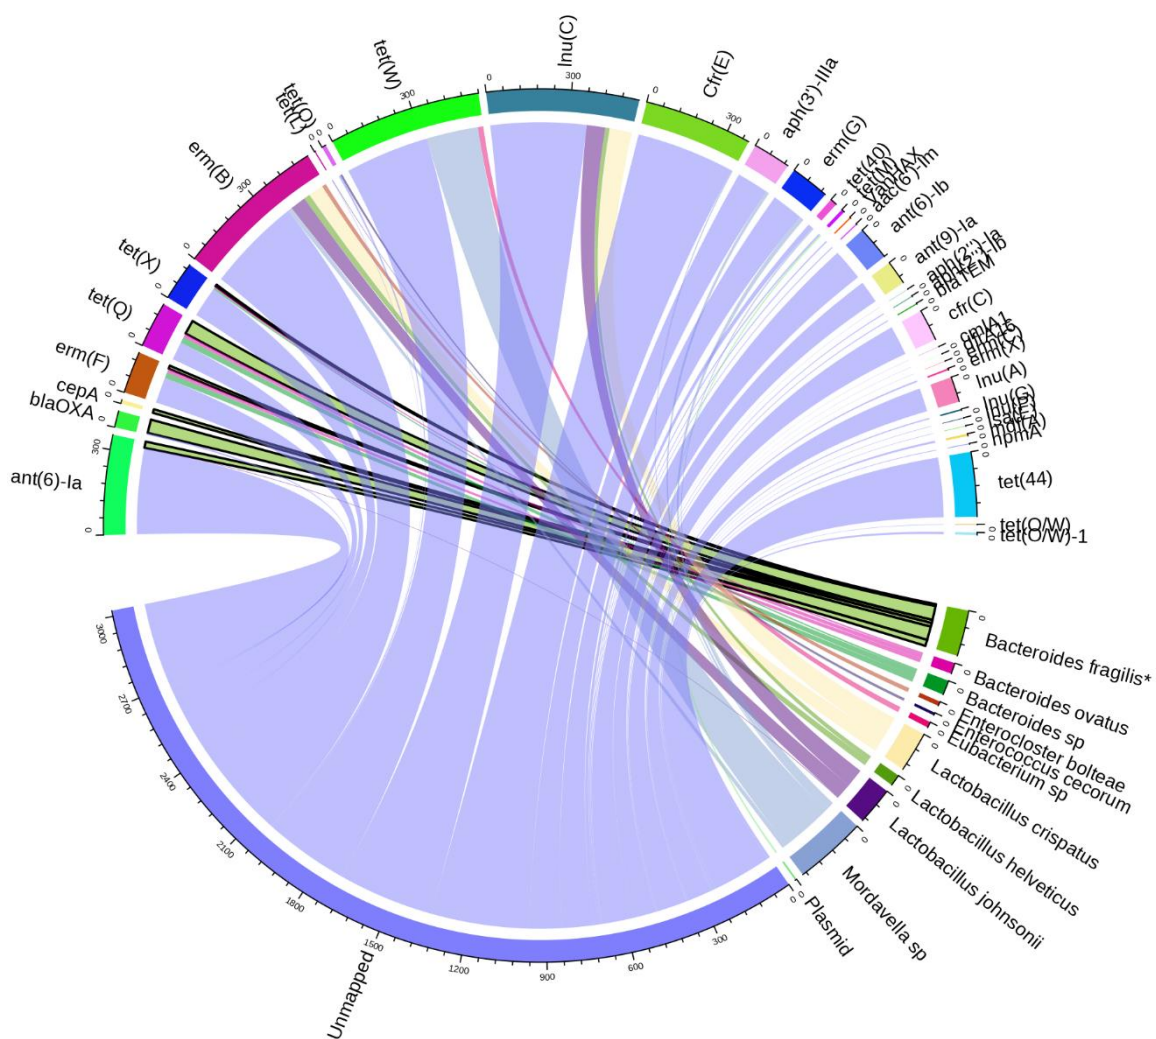

**Figure S5:** Antimicrobial resistance gene – host links for experiment UEQL: Unspiked – Enzymatic Lysis – Quick-DNA magbead HMW– Ligation sequencing. Read counts are indicated by the circular scale. Connections from ARG to spike-in DMC members are highlighted in bold. \*: Members of the spiked-in DMC.

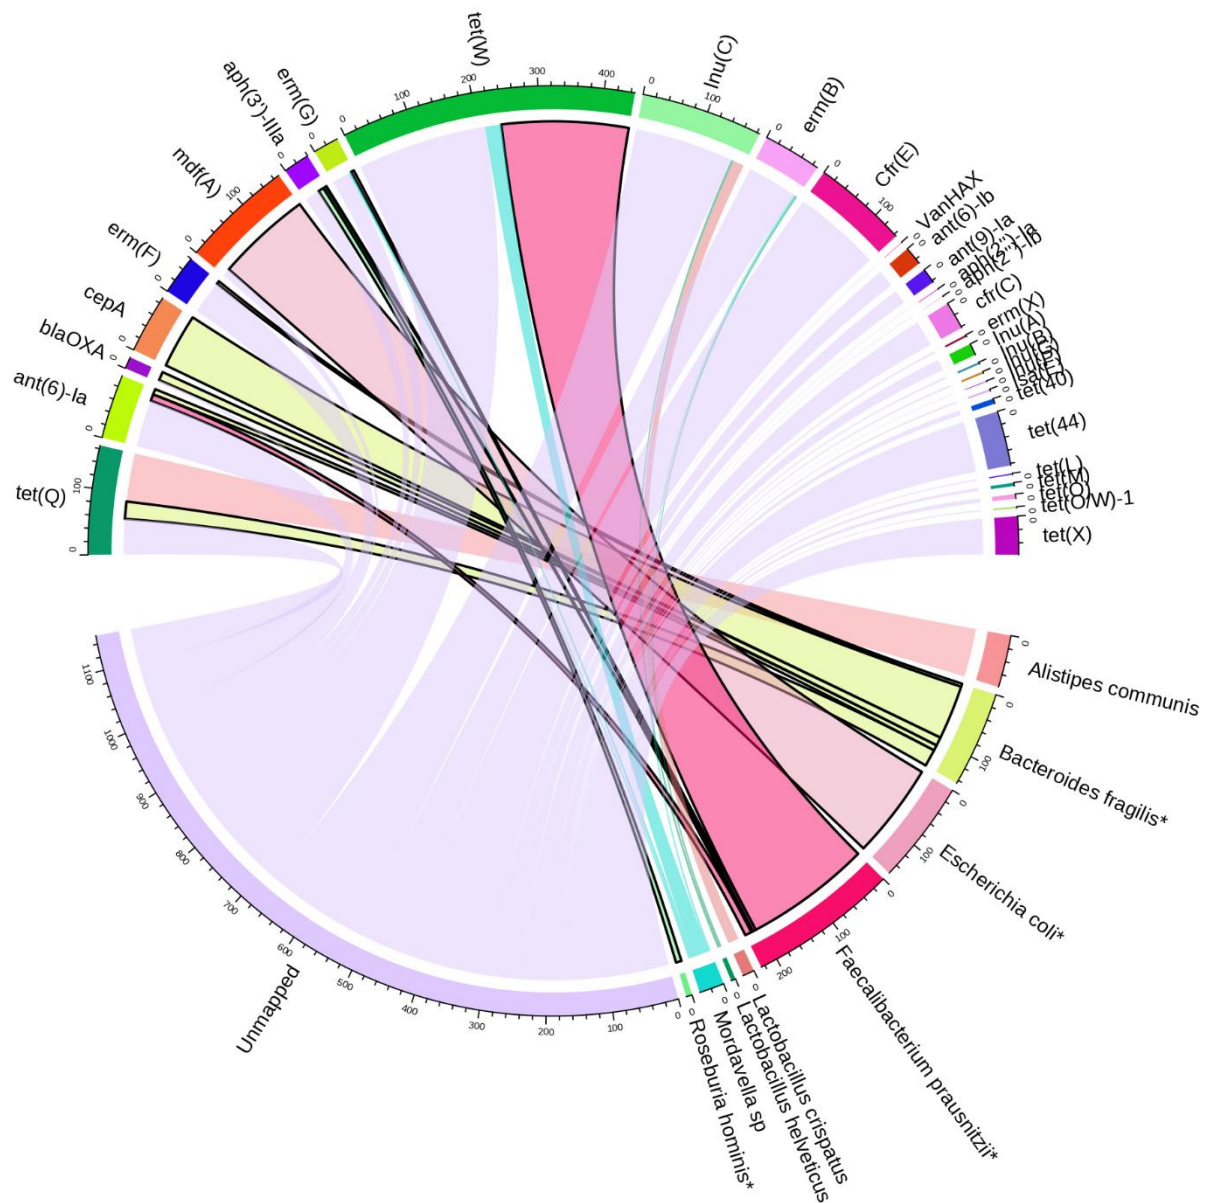

**Figure S6:** Antimicrobial resistance gene – host links for experiment EQL: Enzymatic Lysis – Quick-DNA magbead HMW – Ligation sequencing. Read counts are indicated by the circular scale. Connections from ARG to spike-in DMC members are highlighted in bold. \*: Members of the spiked-in DMC.



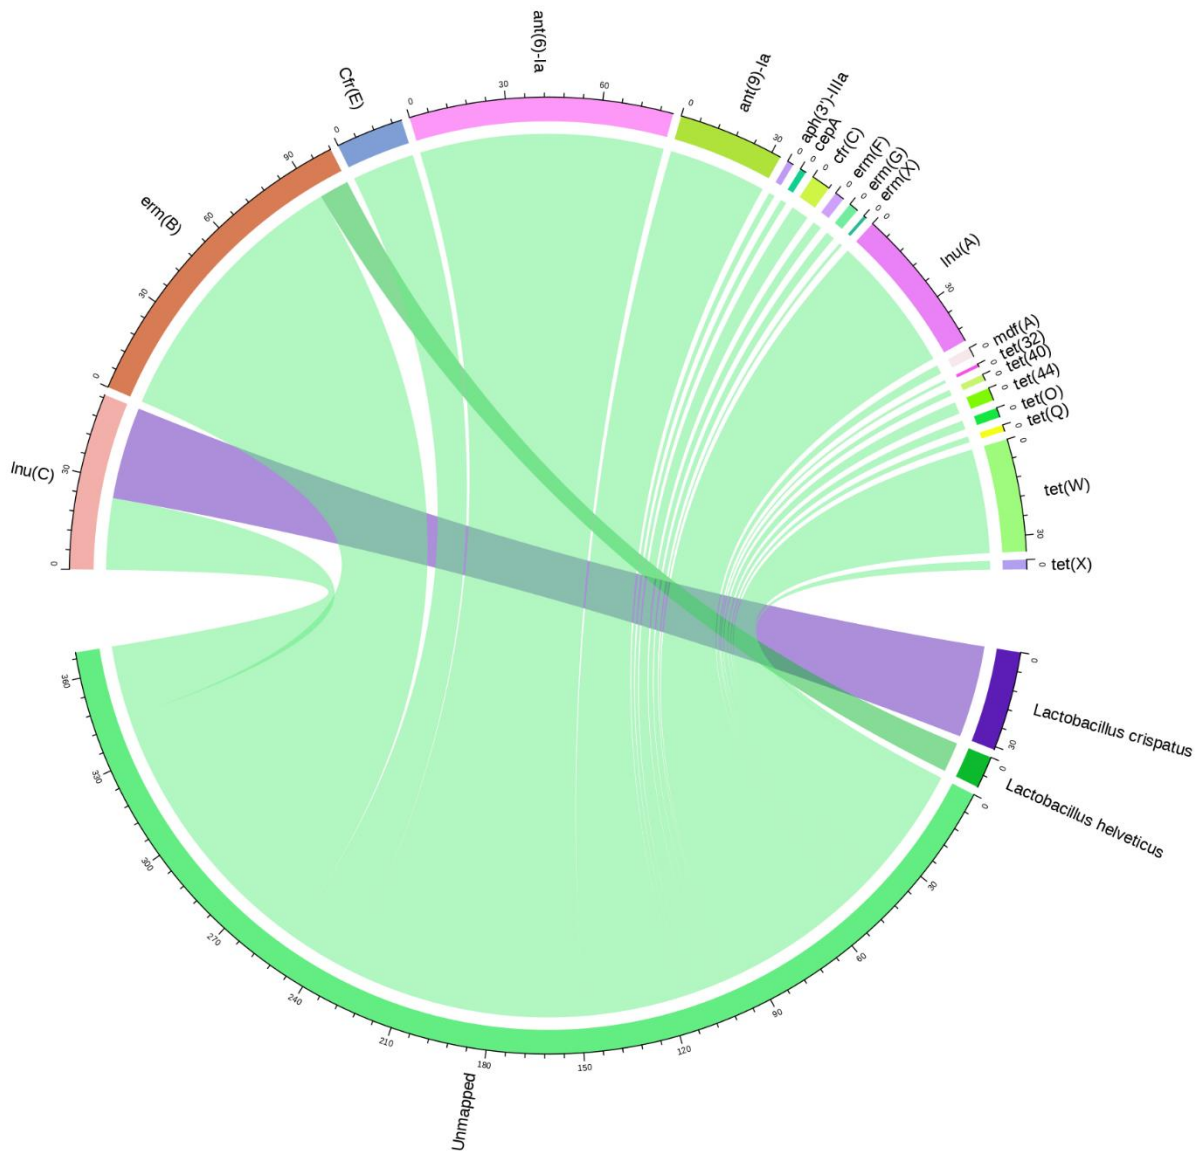

**Figure S8:** Antimicrobial resistance gene – host links for experiment BDR: Bead-beating – DNAexpress – Rapid sequencing. Read counts are indicated by the circular scale. Connections from ARG to spike-in DMC members are highlighted in bold. \*: Members of the spiked-in DMC.



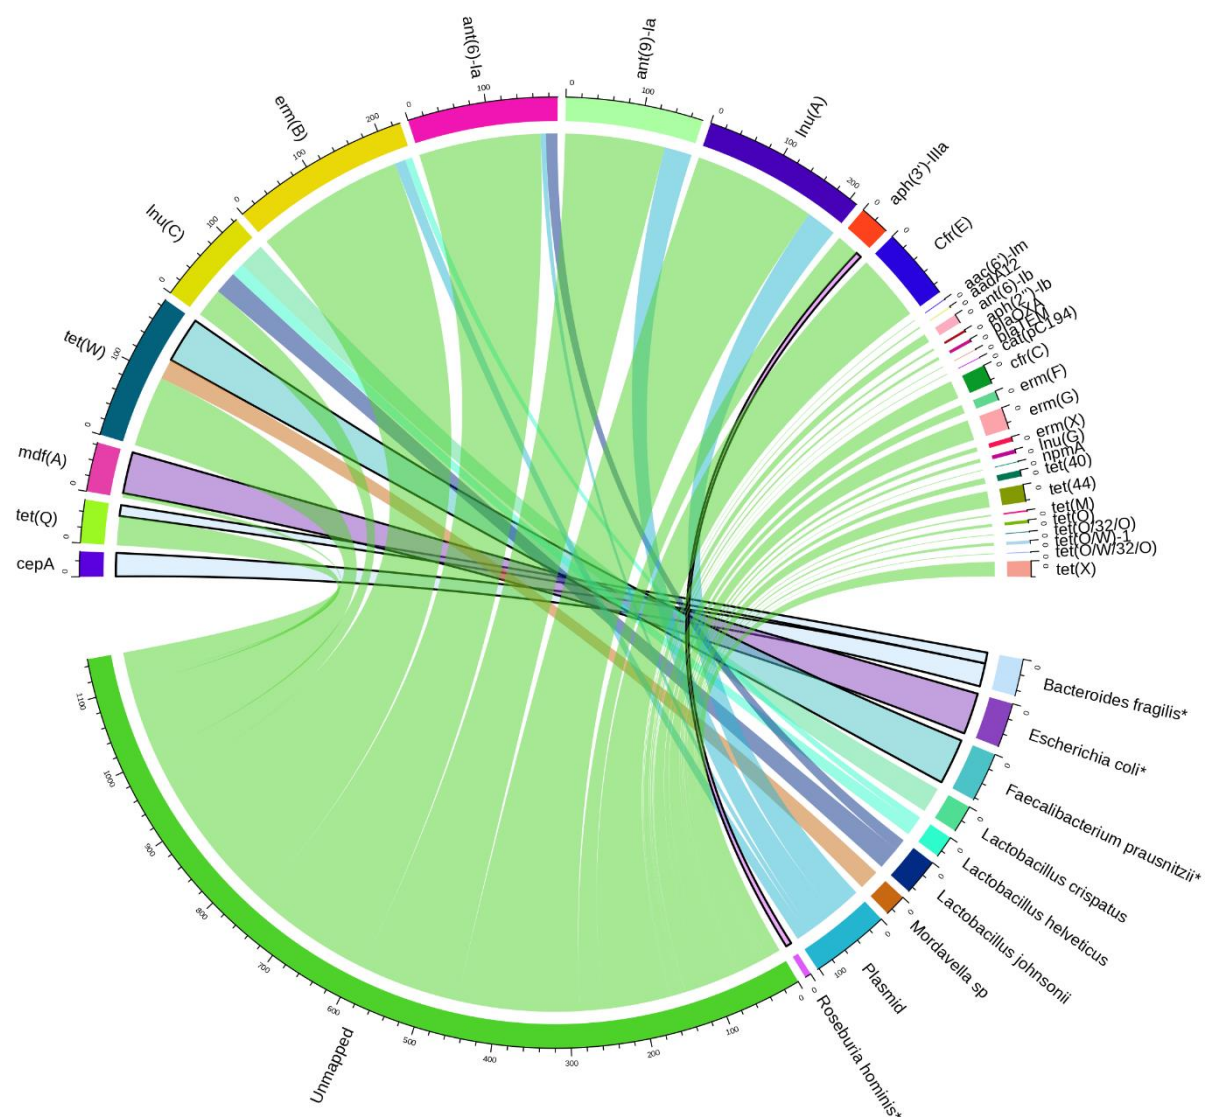

**Figure S9:** Antimicrobial resistance gene – host links for experiment BQR: Bead-beating – Quick-DNA HMW magbead – Rapid sequencing. Read counts are indicated by the circular scale. Connections from ARG to spike-in DMC members are highlighted in bold. \*: Members of the spiked-in DMC.
